# Supplementary material for: Short-term outcome for high-risk patients after esophagectomy
Source: PubMed Central journal article supplement (PMC9817823; doi:10.1093/dote/doac028), 2022-06-21
Supplement: supplemental_table_1_doac028.pdf [file supplemental_table_1_doac028.pdf]

| Characteristics                        | Unmatched cohort high-risk<br>n=695 |                  |      | Matched cohort high-risk<br>n=460 |                  |      |
|----------------------------------------|-------------------------------------|------------------|------|-----------------------------------|------------------|------|
|                                        | McKeown<br>n=282                    | THE<br>n=413     | SMD  | McKeown<br>n=230                  | THE<br>N=230     | SMD  |
| Age, years                             | 68 (63-72)                          | 70 (64-75)       | 0.25 | 69 (64-72)                        | 68 (62-74)       | 0.01 |
| BMI, kg/m <sup>2</sup>                 | 25.9 (23.5-28.7)                    | 26.1 (23.5-29.2) | 0.10 | 26.2 (23.7-28.7)                  | 26.1 (23.2-29.0) | 0.01 |
| Gender                                 |                                     |                  |      |                                   |                  |      |
| Male                                   | 216 (76.6)                          | 327 (79.2)       | 0.06 | 178 (77.4)                        | 179 (77.8)       | 0.01 |
| CCI score                              |                                     |                  |      |                                   |                  |      |
| 2                                      | 178 (63.1)                          | 251 (60.8)       | 0.05 | 143 (62.2)                        | 143 (62.2)       | 0.00 |
| 3                                      | 76 (27.0)                           | 98 (23.7)        | 0.07 | 61 (26.5)                         | 59 (25.7)        | 0.02 |
| ≥4                                     | 28 (9.9)                            | 64 (15.5)        | 0.17 | 26 (11.3)                         | 28 (12.2)        | 0.03 |
| ASA-classification                     |                                     |                  |      |                                   |                  |      |
| I-II                                   | 186 (66.0)                          | 240 (58.1)       | 0.16 | 146 (63.5)                        | 152 (66.1)       | 0.05 |
| III-IV                                 | 96 (34.0)                           | 173 (41.9)       | 0.16 | 84 (36.5)                         | 78 (33.9)        | 0.05 |
| Tumor histology                        |                                     |                  |      |                                   |                  |      |
| AC                                     | 203 (72.0)                          | 350 (84.7)       | 0.31 | 182 (79.1)                        | 184 (80.0)       | 0.02 |
| SCC                                    | 64 (22.7)                           | 54 (13.1)        | 0.25 | 41 (17.8)                         | 38 (16.5)        | 0.03 |
| Other                                  | 15 (5.3)                            | 9 (2.2)          | 0.16 | 7 (3.0)                           | 8 (3.5)          | 0.03 |
| Tumor location                         |                                     |                  |      |                                   |                  |      |
| Distal*                                | 241 (85.5)                          | 267 (64.6)       | -    | 192 (83.5)                        | 158 (68.7)       | -    |
| GEJ*                                   | 41 (14.5)                           | 146 (35.4)       | -    | 38 (16.5)                         | 72 (31.3)        | -    |
| From the incisors, cm                  | 34 (31-36)                          | 36 (34-38)       | 0.59 | 35 (32-37)                        | 35 (33-37)       | 0.09 |
| cT-stage                               |                                     |                  |      |                                   |                  |      |
| cT0-1                                  | 20 (7.1)                            | 23 (5.6)         | 0.06 | 13 (5.7)                          | 12 (5.2)         | 0.02 |
| cT2                                    | 46 (16.3)                           | 92 (22.3)        | 0.15 | 42 (18.3)                         | 48 (20.9)        | 0.06 |
| cT3-4                                  | 205 (72.7)                          | 277 (67.1)       | 0.12 | 164 (71.3)                        | 163 (70.9)       | 0.01 |
| cTx                                    | 11 (3.9)                            | 21 (5.1)         | 0.06 | 11 (4.8)                          | 7 (3.0)          | 0.09 |
| cN-stage                               |                                     |                  |      |                                   |                  |      |
| cN0                                    | 99 (35.1)                           | 185 (44.8)       | 0.20 | 89 (38.7)                         | 89 (38.7)        | 0.00 |
| cN1                                    | 112 (39.7)                          | 149 (36.1)       | 0.07 | 87 (37.8)                         | 84 (36.5)        | 0.03 |
| cN2-3                                  | 55 (19.5)                           | 60 (14.5)        | 0.13 | 41 (17.8)                         | 45 (19.6)        | 0.05 |
| cNx                                    | 16 (5.7)                            | 19 (4.6)         | 0.07 | 13 (5.7)                          | 12 (5.2)         | 0.02 |
| Neoadjuvant therapy                    |                                     |                  |      |                                   |                  |      |
| None                                   | 30 (10.6)                           | 69 (16.7)        | 0.18 | 26 (11.3)                         | 28 (12.2)        | 0.03 |
| Chemotherapy                           | 15 (5.3)                            | 33 (8.0)         | 0.10 | 12 (5.2)                          | 17 (7.4)         | 0.08 |
| CRT or radiotherapy                    | 237 (84.0)                          | 311 (75.3)       | 0.22 | 192 (83.5)                        | 185 (80.4)       | 0.08 |
| Previous abdominal or thoracic surgery |                                     |                  |      |                                   |                  |      |
| Yes                                    | 113 (39.9)                          | 170 (41.2)       | 0.02 | 137 (59.6)                        | 135 (58.7)       | 0.02 |
| Approach*                              |                                     |                  |      |                                   |                  |      |
| Open                                   | 54 (19.1)                           | 246 (59.6)       | -    | 40 (17.4)                         | 138 (60.0)       | -    |
| MI abdomen                             | 10 (3.5)                            | 167 (40.4)       | -    | 9 (3.9)                           | 92 (40.0)        | -    |
| MI thorax                              | 4 (1.4)                             | -                | -    | 3 (1.3)                           | -                | -    |
| MIE                                    | 214 (75.9)                          | -                | -    | 178 (77.4)                        | -                | -    |
| Anastomosis*                           |                                     |                  |      |                                   |                  |      |
| Cervical                               | 282 (100)                           | 413 (100)        | -    | 230 (100)                         | 230 (100)        | -    |

**Supplemental table 1.** Baseline characteristics of high-risk after McKeown and THE before and after propensity score matching. Data are n (%) or median (IQR).

AC indicates adenocarcinoma; ASA, American Association of Anesthesiologists; BMI, body mass index; CCI, Charlson Comorbidity Index; CRT, chemoradiotherapy; GEJ, gastroesophageal junction; IQR, interquartile range; MI, minimally invasive; MIE, minimally invasive esophagectomy; SMD, standardized mean difference; SCC, squamous cell carcinoma; THE, transhiatal esophagectomy.

\*Variables were not used in propensity score matching
